# Supplementary material for: NUTRITIONAL IMMUNITY, ZINC SUFFICIENCY AND COVID-19 MORTALITY IN SOCIALLY SIMILAR EUROPEAN POPULATIONS
Source: bioRxiv or medRxiv preprint supplement (doi:10.1101/2020.11.04.20151290), 2021-08-27
Supplement: Supplementary file [file media-1.pdf]

| COUNTRIES            | CpM 12 Mar |       | DpM 26 Mar |        | CpM 26 Apr |        | DpM 12 Apr |        | CpM 26 Apr |        | DpM 26 Apr |        | CpM 12 May |        | DpM 12 May |        | CpM 26 May |       | DpM 26 May |   | CpM 12 Jun |   | DpM 12 Jun |   | CpM 26 Jun |   | DpM 26 Jun |  | Population | % Zn Def. (2005) | % Zn Suff. (2005) |
|----------------------|------------|-------|------------|--------|------------|--------|------------|--------|------------|--------|------------|--------|------------|--------|------------|--------|------------|-------|------------|---|------------|---|------------|---|------------|---|------------|--|------------|------------------|-------------------|
|                      | 1          | 2     | 1          | 2      | 1          | 2      | 1          | 2      | 1          | 2      | 1          | 2      | 1          | 2      | 1          | 2      | 1          | 2     | 1          | 2 | 1          | 2 | 1          | 2 | 1          | 2 |            |  |            |                  |                   |
| Iceland              | 342.51     | 0.00  | 2347.79    | 5.85   | 4979.54    | 23.42  | 5245.93    | 29.27  | 5272.28    | 29.27  | 5281.06    | 29.27  | 5288.84    | 29.27  | 5327.90    | 29.27  | 341598     | 3.10  | 96.90      |   |            |   |            |   |            |   |            |  |            |                  |                   |
| France               | 44.04      | 0.93  | 446.50     | 25.97  | 1461.06    | 220.22 | 1907.82    | 349.69 | 2147.53    | 412.99 | 2229.12    | 436.54 | 2393.48    | 449.47 | 2495.31    | 455.66 | 65296963   | 3.90  | 96.10      |   |            |   |            |   |            |   |            |  |            |                  |                   |
| Ireland              | 14.15      | 0.20  | 367.73     | 3.84   | 1950.46    | 67.52  | 3892.64    | 218.94 | 4697.25    | 300.01 | 4999.08    | 325.68 | 5103.19    | 343.88 | 5136.34    | 348.93 | 4946514    | 4.00  | 96.00      |   |            |   |            |   |            |   |            |  |            |                  |                   |
| Finland              | 19.67      | 0.00  | 172.86     | 0.90   | 536.62     | 10.10  | 825.68     | 34.28  | 1083.16    | 49.62  | 1195.93    | 56.30  | 1276.23    | 58.64  | 1297.52    | 59.18  | 5542120    | 4.60  | 95.40      |   |            |   |            |   |            |   |            |  |            |                  |                   |
| UK                   | 7.89       | 0.13  | 155.54     | 12.92  | 1123.82    | 180.71 | 2038.02    | 352.76 | 3019.69    | 472.95 | 3536.57    | 532.41 | 3906.24    | 577.36 | 4125.05    | 592.38 | 67943420   | 4.60  | 95.40      |   |            |   |            |   |            |   |            |  |            |                  |                   |
| Switzerland          | 100.18     | 0.81  | 1363.11    | 22.16  | 2933.15    | 127.64 | 3353.93    | 185.81 | 3506.16    | 215.47 | 3550.13    | 221.01 | 3584.98    | 223.66 | 3633.80    | 226.43 | 8664751    | 4.90  | 95.10      |   |            |   |            |   |            |   |            |  |            |                  |                   |
| Netherlands          | 35.82      | 0.29  | 433.52     | 25.32  | 1492.73    | 159.68 | 2207.86    | 261.07 | 2507.67    | 321.45 | 2659.00    | 341.64 | 2827.19    | 353.13 | 2917.27    | 356.05 | 17141028   | 5.00  | 95.00      |   |            |   |            |   |            |   |            |  |            |                  |                   |
| Spain                | 665.43     | 1.84  | 3118.24    | 93.35  | 4667.48    | 368.05 | 5243.71    | 495.96 | 5493.08    | 574.36 | 5622.58    | 595.47 | 5738.28    | 604.71 | 5819.68    | 606.06 | 46757733   | 5.40  | 94.60      |   |            |   |            |   |            |   |            |  |            |                  |                   |
| Italy                | 250.17     | 16.87 | 1333.08    | 136.33 | 2586.60    | 330.19 | 3269.98    | 441.89 | 3659.54    | 512.71 | 3814.12    | 546.69 | 3909.39    | 567.70 | 3970.11    | 576.73 | 60447245   | 5.80  | 94.20      |   |            |   |            |   |            |   |            |  |            |                  |                   |
| Sweden               | 76.27      | 0.10  | 296.36     | 13.26  | 1079.30    | 134.03 | 1865.89    | 253.13 | 2775.15    | 369.85 | 3523.17    | 438.21 | 4982.21    | 500.53 | 6450.65    | 536.53 | 10109375   | 6.10  | 93.90      |   |            |   |            |   |            |   |            |  |            |                  |                   |
| Norway <sup>5</sup>  | 147.38     | 0.18  | 621.22     | 2.58   | 1202.10    | 23.58  | 1386.69    | 37.03  | 1502.76    | 42.00  | 1544.40    | 43.29  | 1588.06    | 44.58  | 1627.11    | 45.87  | 5428015    | 6.20  | 93.80      |   |            |   |            |   |            |   |            |  |            |                  |                   |
| Denmark <sup>5</sup> | 116.30     | 0.00  | 323.87     | 7.07   | 1065.31    | 47.11  | 1479.60    | 72.82  | 1827.45    | 90.93  | 1971.87    | 97.14  | 2072.12    | 102.49 | 2187.04    | 104.22 | 5795502    | 6.20  | 93.80      |   |            |   |            |   |            |   |            |  |            |                  |                   |
| Portugal             | 7.65       | 0.00  | 347.73     | 5.89   | 1627.29    | 49.45  | 2324.22    | 88.60  | 2738.77    | 114.11 | 3042.34    | 131.67 | 3549.91    | 147.67 | 4009.69    | 152.57 | 10191814   | 6.30  | 93.70      |   |            |   |            |   |            |   |            |  |            |                  |                   |
| Belgium              | 34.40      | 0.34  | 537.60     | 41.30  | 2556.27    | 370.16 | 3977.84    | 627.10 | 4637.01    | 753.16 | 4953.97    | 797.05 | 5157.80    | 821.97 | 5268.77    | 829.30 | 11597764   | 6.80  | 93.20      |   |            |   |            |   |            |   |            |  |            |                  |                   |
| Lithuania            | 1.102      | 0     | 100.651    | 1.469  | 386.807    | 8.449  | 523.824    | 15.061 | 545.496    | 18.367 | 600.597    | 23.142 | 643.576    | 27.183 | 663.412    | 28.652 | 2725537    | 7.5   | 92.50      |   |            |   |            |   |            |   |            |  |            |                  |                   |
| Hungary              | 1.66       | 0.00  | 27.03      | 1.04   | 146.02     | 10.25  | 258.90     | 28.17  | 343.09     | 44.01  | 390.52     | 51.68  | 419.73     | 57.48  | 427.39     | 59.86  | 9656316    | 8.40  | 91.60      |   |            |   |            |   |            |   |            |  |            |                  |                   |
| Germany              | 32.75      | 0.07  | 524.15     | 3.19   | 1525.21    | 36.05  | 1882.08    | 71.29  | 2065.81    | 92.31  | 2162.64    | 101.38 | 2233.77    | 105.73 | 2319.04    | 107.67 | 83827321   | 9.00  | 91.00      |   |            |   |            |   |            |   |            |  |            |                  |                   |
| Poland               | 0.819      | 0     | 27.77      | 0.37   | 167.941    | 5.496  | 297.86     | 13.845 | 431.373    | 21.429 | 571.544    | 26.607 | 745.139    | 32.103 | 875.085    | 37.308 | 37850425   | 10.3  | 89.70      |   |            |   |            |   |            |   |            |  |            |                  |                   |
| Estonia              | 20.35      | 0.00  | 405.52     | 0.75   | 986.67     | 18.84  | 1238.43    | 36.93  | 1316.07    | 45.98  | 1382.40    | 47.49  | 1484.91    | 47.49  | 1496.97    | 47.49  | 1326680    | 10.50 | 89.50      |   |            |   |            |   |            |   |            |  |            |                  |                   |
| Czechia              | 10.92      | 0.00  | 189.32     | 0.84   | 561.32     | 12.88  | 693.23     | 20.54  | 769.50     | 26.42  | 846.98     | 29.59  | 929.87     | 30.71  | 1032.56    | 32.39  | 10712210   | 11.00 | 89.00      |   |            |   |            |   |            |   |            |  |            |                  |                   |
| Ukraine              | 0.00       | 0.00  | 2.584      | 0.091  | 57.416     | 1.669  | 185.783    | 4.596  | 357.801    | 9.329  | 485.78     | 14.245 | 664.704    | 19.527 | 914.808    | 24.398 | 43757273   | 11.4  | 88.60      |   |            |   |            |   |            |   |            |  |            |                  |                   |
| Bulgaria             | 1.007      | 0.144 | 34.828     | 0.432  | 95.129     | 4.03   | 179.465    | 7.915  | 286.395    | 13.384 | 350.15     | 18.709 | 444.128    | 24.178 | 634.387    | 30.367 | 6953085    | 15.3  | 84.70      |   |            |   |            |   |            |   |            |  |            |                  |                   |
| Slovakia             | 3.85       | 0.00  | 41.39      | 0.00   | 135.90     | 0.37   | 252.56     | 3.30   | 268.31     | 4.94   | 277.10     | 5.13   | 282.41     | 5.13   | 300.91     | 5.13   | 5460073    | 16.30 | 83.70      |   |            |   |            |   |            |   |            |  |            |                  |                   |

| Average (High Zn suff. ≥93.8% countries(12)) | 151.65 | 1.78 | 914.99 | 29.13 | 2089.85 | 141.02 | 2726.48 | 227.72 | 3124.31 | 282.64 | 3327.25 | 305.31 | 3555.93 | 321.29 | 3748.98 | 328.11 |      | 4.98      | 95.02 |      |
|----------------------------------------------|--------|------|--------|-------|---------|--------|---------|--------|---------|--------|---------|--------|---------|--------|---------|--------|------|-----------|-------|------|
| STDEV                                        | 191.10 | 4.78 | 952.49 | 41.97 | 1443.75 | 118.60 | 1472.46 | 162.11 | 1448.39 | 195.01 | 1460.40 | 210.62 | 1525.52 | 222.57 | 1690.16 | 227.95 | Pop. | 298414264 | 1.00  | 1.00 |

| Average (Low Zn suff. countries <93.8% (11)) | 10.41 | 0.05 | 203.51 | 5.03  | 749.63 | 47.06  | 1074.02 | 83.40  | 1250.87 | 103.95 | 1369.46 | 113.34 | 1505.09 | 119.92 | 1631.18 | 123.19 |      | 10.25     | 89.75 |      |
|----------------------------------------------|-------|------|--------|-------|--------|--------|---------|--------|---------|--------|---------|--------|---------|--------|---------|--------|------|-----------|-------|------|
| STDEV                                        | 12.95 | 0.11 | 210.70 | 12.15 | 827.40 | 108.24 | 1210.52 | 182.42 | 1388.03 | 218.12 | 1474.75 | 230.05 | 1555.97 | 236.58 | 1611.60 | 237.97 | Pop. | 224058498 | 3.23  | 3.23 |

**Note:**  
1. Countries socially similar with supposedly comparable confounders ref 1,2.)  
2. CpM: Cases per million; DpM: Deaths per million; Mar: March; Apr: April; Jun: June; Jul: July; Aug: August. 2020  
3. Zn deficiency (def.; Sufficiency (suff. = 100-Def); estimates for populations based upon overall intake (e.g. food, fortified articles) and stunting prevalence from Wessells, K. R., & Brown, K. H. (2012). Estimating the global prevalence of zinc deficiency: results based on zinc availability in national food supplies and the prevalence of stunting. PLoS one, 7(11) : e50568. https://www.ncbi.nlm.nih.gov/pmc/articles/PMC3510072/  
4. STDEV: Standard deviation

5. If these countries also included in LOW Suff. group the mortality and incidence rate gap with HIGH Suff. countries will increase further. However for the sake of keeping groups almost equal sized, we preferred to err to show lesser difference between the two group of countries, as we still do not have the cause and effect evidence for the association observed.
