# Supplementary material for: NUTRITIONAL IMMUNITY, ZINC SUFFICIENCY AND COVID-19 MORTALITY IN SOCIALLY SIMILAR EUROPEAN POPULATIONS
Source: bioRxiv or medRxiv preprint supplement (doi:10.1101/2020.11.04.20151290), 2021-08-27
Supplement: Supplementary file [file media-2.pdf]

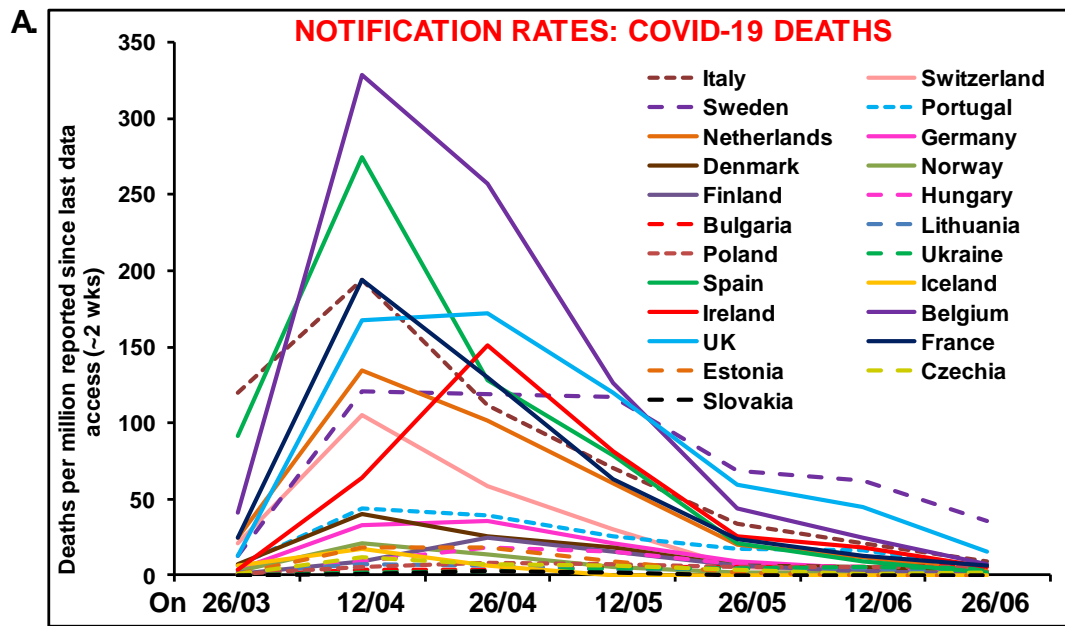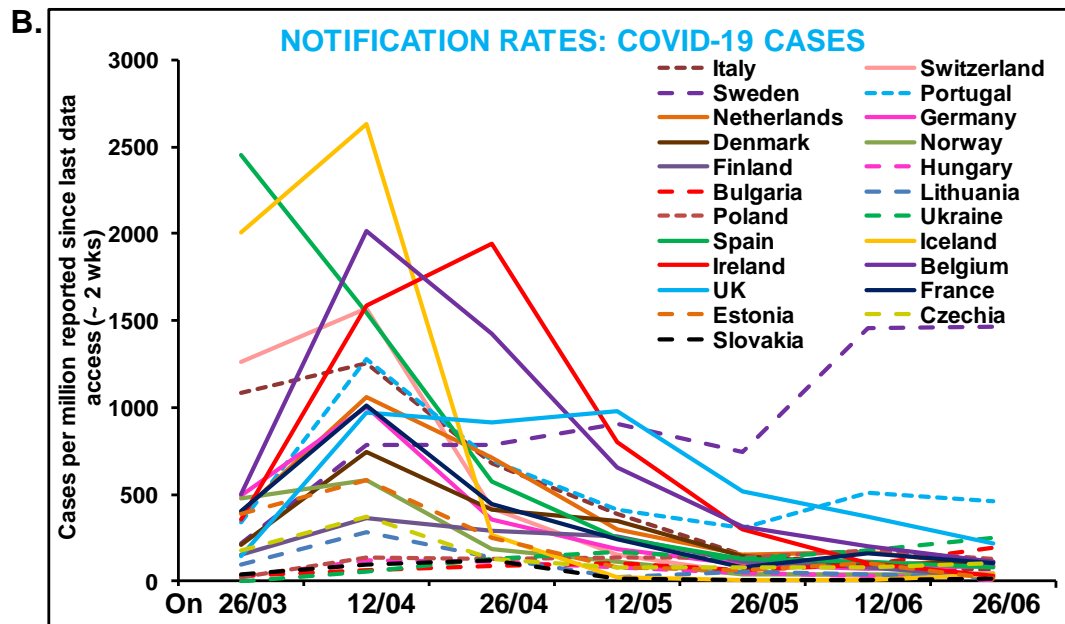

**Supplementary Figure 2.** The waves of COVID-19 deaths (8 out of 10 were elderly)(**A**) as it passed through countries under study and incidence rates (majority younger – without dysregulated Zn homeostasis) (**B**).
